# Supplementary material for: [Cp′FeI]2 as convenient entry into iron-modified pincer complexes: bimetallic η6,κ1-POCOP-pincer iron iridium compounds
Source: Royal Society of Chemistry journal article supplement (doi:10.1039/c1nj20399a), 2011-01-01
Supplement: c1nj20399a.pdf [file c1nj20399a.pdf]

Supporting information for

# [Cp'FeI]<sub>2</sub> as Convenient Entry into Iron-modified Pincer Complexes: Bimetallic $\eta^6$ , $\kappa^1$ -POCOP-Pincer Iron Iridium Compounds

*Marc D. Walter\**, and *Peter S. White*

Contribution from the Institut für Anorganische und Analytische Chemie, Technische Universität Braunschweig, Hagenring 30, 38106 Braunschweig (Germany), and the Department of Chemistry, University of North Carolina at Chapel Hill, Chapel Hill, North Carolina 27599-3290 (USA)

E-mail: [mwalter@tu-bs.de](mailto:mwalter@tu-bs.de)

*Table of Content:*

|                                                                                                 |     |
|-------------------------------------------------------------------------------------------------|-----|
| 1. Variable Temperature <sup>1</sup> H NMR Behavior of Complex <b>2</b>                         | S 2 |
| 2. Variable Temperature <sup>1</sup> H NMR Behavior of Complexes <b>1-I</b> in various solvents | S 3 |
| 3. Optical Spectra of <b>1-I</b> , <b>1-Br</b> , <b>1-Cl</b> and <b>2</b>                       | S 5 |
| 4. ORTEP Diagram of <b>6</b>                                                                    | S 5 |
| 5. Catalytic Transfer Dehydrogenation                                                           | S 6 |
| 6. Cartesian Coordinates of Fully Optimized Structures                                          | S 6 |

### 1. Variable Temperature $^1\text{H}$ NMR Behavior of Complexes **2**.

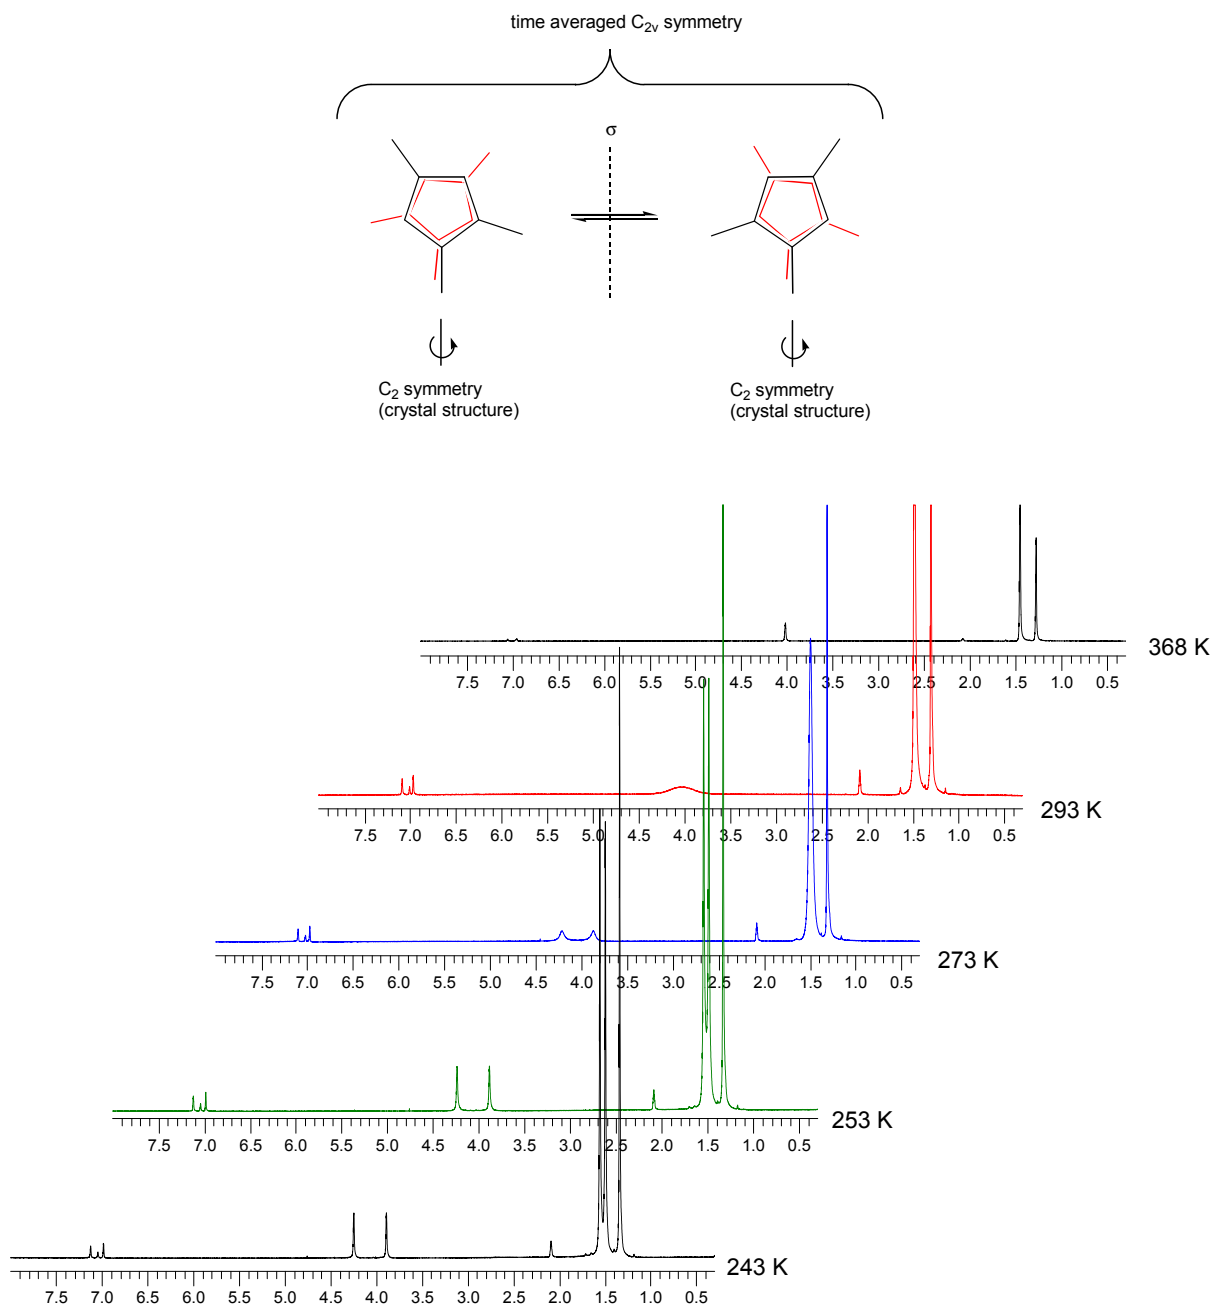

**Figure S1.** Stacked plot of  $^1\text{H}$  NMR spectra of  $\text{Cp}'_2\text{Fe}$  (**2**) in toluene- $d_8$  from 243 K to 368 K.

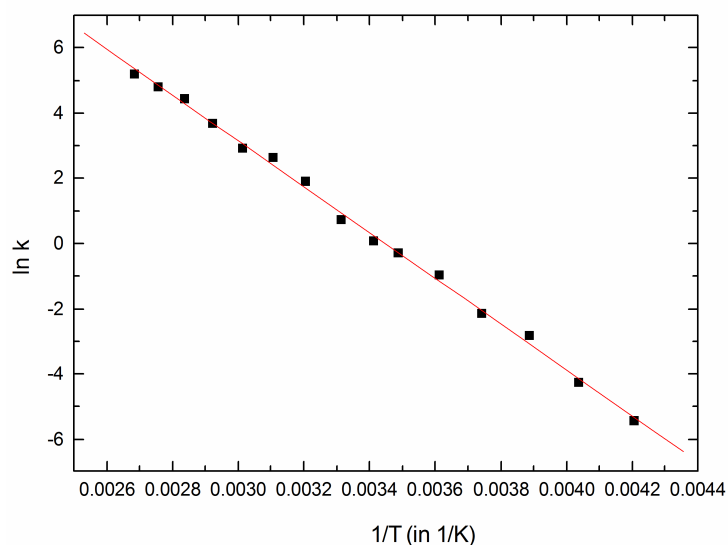

**Figure S2.** Arrhenius plot derived from line shape analysis of variable temperature  $^1\text{H}$  NMR data of  $\text{Cp}'_2\text{Fe}$  (**2**) in toluene- $d_8$  ( $R^2=0.9985$ ):  $\Delta H^\ddagger=14.2\pm 1.0$  kcal/mol and  $\Delta S^\ddagger=1.0\pm 0.5$  cal/(mol K).

## 2. Variable Temperature $^1\text{H}$ NMR Behavior of Complexes **1-I** in Various Solvents

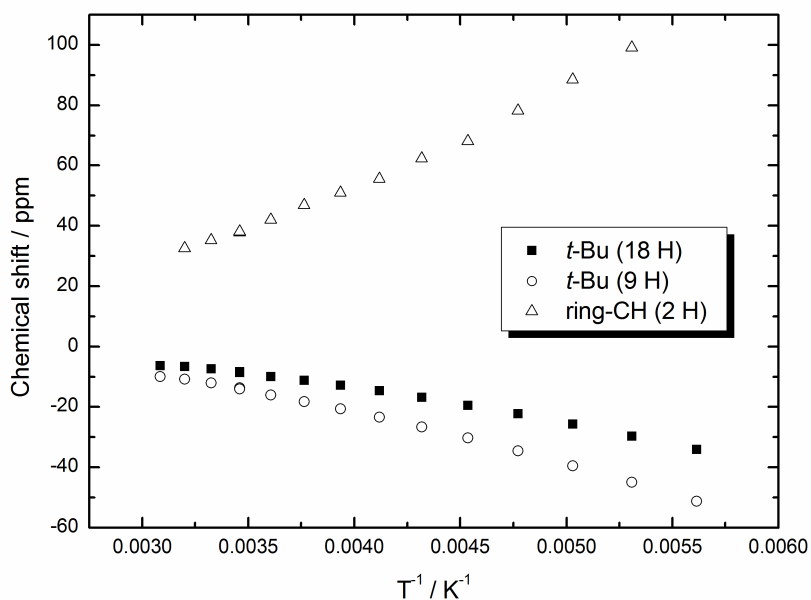

**Figure S3.** Chemical Shift ( $\delta$ ) vs.  $T^{-1}$  plot of  $^1\text{H}$  NMR resonances of  $[\text{Cp}'\text{FeI}]_2$  (**1-I**) in toluene- $d_8$  from 192 K to 312 K.

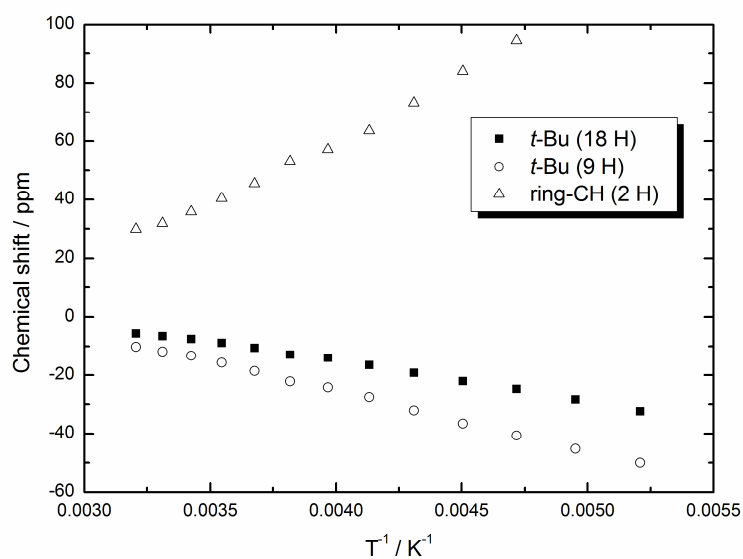

**Figure S4.** Chemical Shift ( $\delta$ ) vs.  $T^{-1}$  plot of  $^1\text{H}$  NMR resonances of  $[\text{Cp}'\text{FeI}]_2$  (**1-I**) in  $\text{CD}_2\text{Cl}_2$  from 192 K to 312 K.

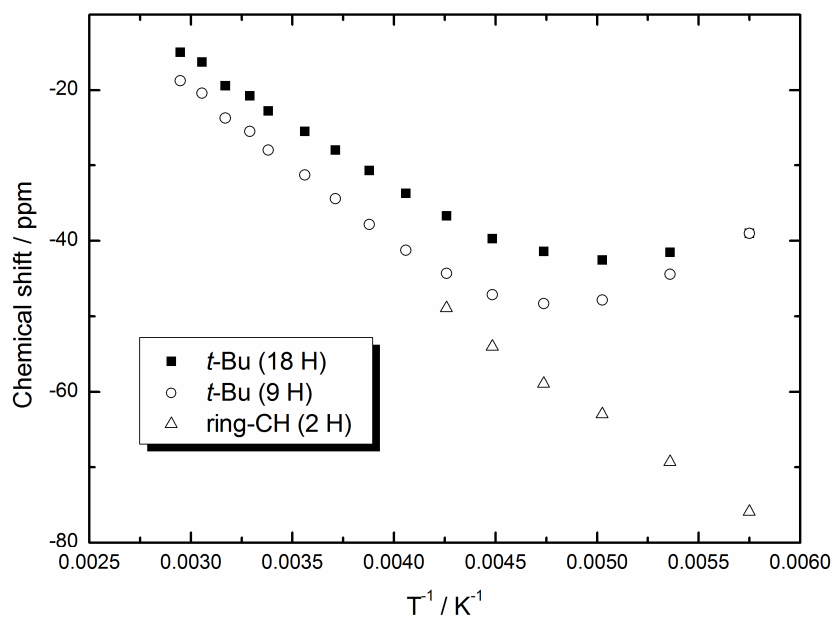

**Figure S5.** Chemical Shift ( $\delta$ ) vs.  $T^{-1}$  plot of  $^1\text{H}$  NMR resonances of  $[\text{Cp}'\text{FeI}]_2$  (**1-I**) in  $\text{thf-}d_8$  from 186 K to 340 K.

### 3. Optical Spectra of 1-I, 1-Br, 1-Cl and 2

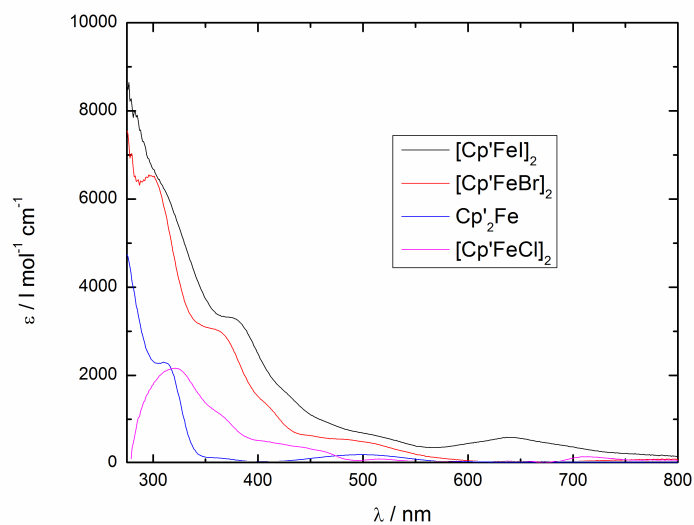

**Figure S6.** Optical Spectra of 1-I, 1-Br, 1-Cl and 2.

### 4. ORTEP Diagram of 6

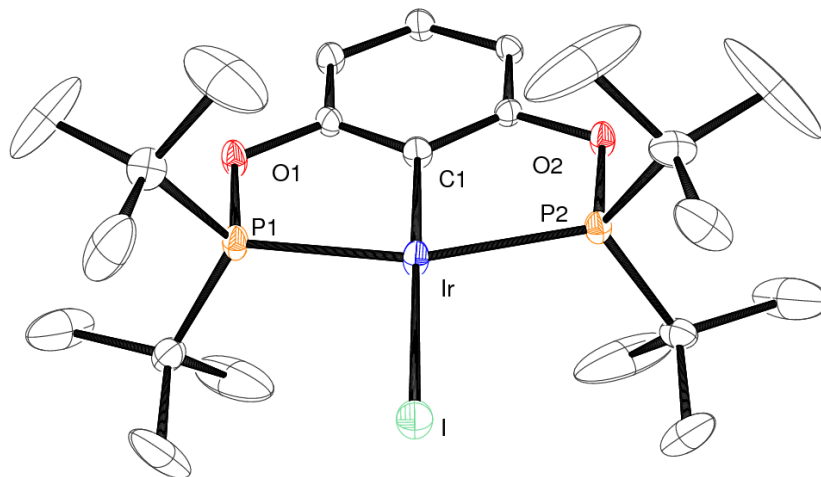

**Figure S7.** ORTEP diagram of 6 (50 % probability ellipsoids). Hydrogen atoms have been omitted for clarity. Selected bond distances (Å): Ir-I 2.7048(3), Ir-P1 2.3008(9), Ir1-P2 2.2997(9), Ir1-C1 2.007(3).

## 5. Catalytic Transfer Dehydrogenation

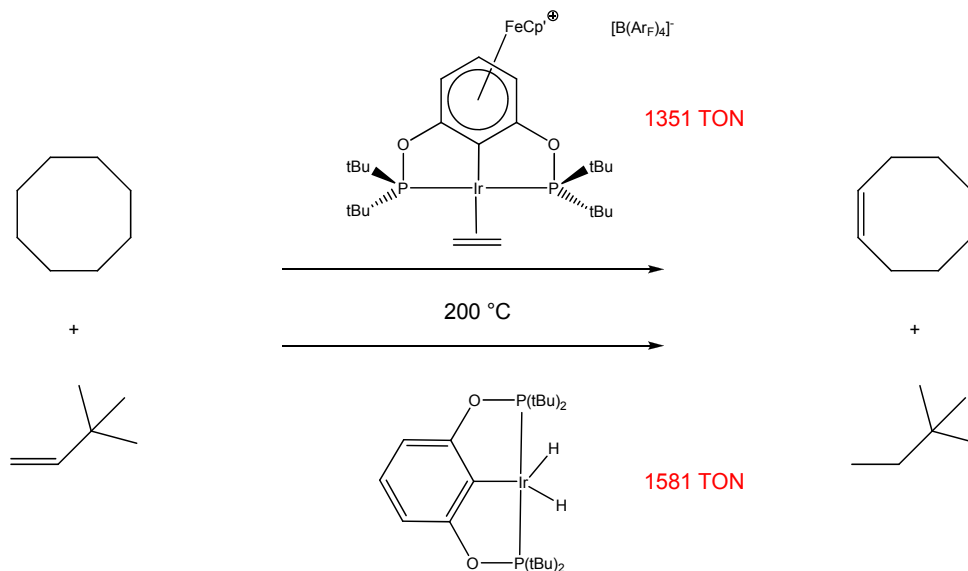

**Table S1.**

| Time / min | (POCOP)Ir(H)(Cl)/NaOtBu<br>TON | [7] <sup>+</sup><br>TON |
|------------|--------------------------------|-------------------------|
| 8          | 922                            | 101                     |
| 31         | 1194                           | 434                     |
| 90         | -                              | 883                     |
| 178        | 1514                           | -                       |
| 918        | 1512                           | -                       |
| 960        | -                              | 1299                    |
| 1365       | -                              | 1301                    |
| 2400       | 1581                           | 1351                    |
| 6170       | 1609                           | -                       |
| 20305      | 1603                           | -                       |

## 6. Cartesian Coordinates of Fully Optimized Structures

### 6.1 C<sub>2</sub>H<sub>4</sub>

|   |          |          |          |
|---|----------|----------|----------|
| C | -0.66734 | 0.02583  | -0.01469 |
| C | 0.66734  | -0.02583 | 0.01469  |
| H | -1.20089 | 0.86244  | -0.47559 |
| H | 1.28355  | 0.76630  | -0.42090 |

|   |          |          |         |
|---|----------|----------|---------|
| H | -1.28355 | -0.76630 | 0.42090 |
| H | 1.20089  | -0.86244 | 0.47559 |

## 6.2 (POCOP)Ir(H)(I)

|   |          |          |          |
|---|----------|----------|----------|
| I | 3.53422  | 0.26722  | -0.30019 |
| P | 0.14693  | 2.10968  | -0.97654 |
| P | 0.62818  | -1.98800 | 1.03847  |
| O | -1.56196 | 2.03714  | -0.98776 |
| O | -1.05571 | -2.27329 | 1.13209  |
| C | -0.60919 | 3.06843  | -3.59289 |
| C | 0.43047  | 0.79483  | -3.36937 |
| C | 1.87497  | 2.84235  | -3.10938 |
| C | 0.47236  | 2.25430  | -2.85367 |
| C | 0.87966  | -3.02989 | -1.48869 |
| C | -0.25147 | 4.94321  | -0.75913 |
| C | -3.50699 | 0.72988  | -0.46316 |
| C | -2.11367 | 0.86972  | -0.46302 |
| C | 0.39630  | 3.74553  | -0.03549 |
| C | 1.14582  | -3.48348 | -0.03229 |
| C | -4.06267 | -0.43875 | 0.07785  |
| C | 2.65092  | -3.77071 | 0.14230  |
| C | 1.90376  | 3.98711  | 0.18645  |
| C | 0.30760  | -4.74714 | 0.25032  |
| C | -1.25208 | -0.12384 | 0.04699  |
| C | -3.25071 | -1.45136 | 0.60951  |
| C | -1.86196 | -1.27352 | 0.59096  |
| C | -0.29603 | 3.56023  | 1.33520  |
| C | 1.09165  | -2.17440 | 2.87533  |
| C | 2.59092  | -1.86241 | 3.06242  |
| C | 0.74810  | -3.57221 | 3.42807  |
| C | 0.25415  | -1.12003 | 3.63678  |
| H | -0.42911 | 2.97755  | -4.67868 |
| H | 0.60178  | 0.79558  | -4.46042 |
| H | 2.10915  | 2.74371  | -4.18401 |
| H | -0.58136 | 4.13781  | -3.34328 |
| H | -1.61845 | 2.68854  | -3.37946 |
| H | -0.54618 | 0.31997  | -3.18391 |
| H | 1.92513  | 3.91363  | -2.86034 |
| H | 1.22271  | 0.18182  | -2.90837 |
| H | 2.65670  | 2.30824  | -2.54537 |
| H | 1.14732  | -3.85298 | -2.17462 |
| H | 0.26949  | 5.19419  | -1.69483 |
| H | 1.49793  | -2.15744 | -1.75825 |
| H | -0.18120 | -2.78510 | -1.65698 |
| H | -1.31403 | 4.76022  | -0.97981 |
| H | -4.13451 | 1.52334  | -0.87361 |
| H | 2.43481  | 4.22209  | -0.74706 |
| H | 2.96006  | -4.51024 | -0.61719 |
| H | 0.56674  | -5.51019 | -0.50473 |
| H | -0.18973 | 5.82901  | -0.10272 |
| H | 3.26419  | -2.86631 | -0.00117 |
| H | -5.14843 | -0.56203 | 0.08647  |
| H | -0.76996 | -4.54298 | 0.17633  |
| H | 2.39563  | 3.11383  | 0.64085  |
| H | 2.02740  | 4.84793  | 0.86684  |
| H | -3.67834 | -2.36060 | 1.03652  |

|    |          |          |         |
|----|----------|----------|---------|
| H  | 2.87719  | -4.20152 | 1.12996 |
| H  | 0.51140  | -5.18017 | 1.23905 |
| H  | -1.37015 | 3.34762  | 1.22931 |
| H  | 0.64125  | 0.76628  | 1.40479 |
| H  | -0.18440 | 4.49528  | 1.91098 |
| H  | 0.16498  | 2.75017  | 1.92028 |
| H  | 3.23971  | -2.63408 | 2.62404 |
| H  | 2.86742  | -0.89703 | 2.61225 |
| H  | 1.39037  | -4.35682 | 3.00139 |
| H  | -0.30508 | -3.83489 | 3.24680 |
| H  | 0.50052  | -0.09527 | 3.32005 |
| H  | -0.82650 | -1.27713 | 3.50337 |
| H  | 2.81017  | -1.81652 | 4.14364 |
| H  | 0.91392  | -3.57178 | 4.51984 |
| H  | 0.48473  | -1.20317 | 4.71290 |
| Ir | 0.76640  | 0.09938  | 0.01886 |

### 6.3 (POCOP)Ir(C<sub>2</sub>H<sub>4</sub>)

|   |          |          |          |
|---|----------|----------|----------|
| C | 2.55697  | -0.03573 | -2.72248 |
| C | 3.76834  | 2.10888  | -2.28755 |
| C | -1.53260 | -2.77301 | -1.97257 |
| C | 3.32634  | 0.77375  | -1.65135 |
| C | -2.31902 | 3.00536  | -1.59546 |
| C | -0.93242 | 3.18331  | -1.49643 |
| C | 4.56656  | -0.01346 | -1.18049 |
| C | -2.93099 | 1.81472  | -1.18010 |
| C | -3.70985 | -3.16576 | -0.80512 |
| C | -0.16297 | 2.13744  | -0.96820 |
| C | -2.18857 | -3.03101 | -0.59416 |
| C | -2.12108 | 0.79754  | -0.65711 |
| C | -0.71897 | 0.91548  | -0.52880 |
| C | -1.61688 | -4.32103 | 0.02906  |
| C | 1.73462  | -2.40146 | 0.06932  |
| C | 3.65131  | 3.14145  | 0.89477  |
| C | 2.82946  | 1.89960  | 1.28822  |
| C | 1.54268  | -2.13434 | 1.44297  |
| C | 3.69424  | 0.93134  | 2.12038  |
| C | -3.96484 | -1.82711 | 2.21636  |
| C | 1.61747  | 2.34063  | 2.14164  |
| C | -2.45315 | -1.52723 | 2.21819  |
| C | -2.22421 | -0.09337 | 2.75248  |
| C | -1.72303 | -2.51869 | 3.14734  |
| H | 3.22369  | -0.21528 | -3.58500 |
| H | 4.34633  | 1.88408  | -3.20203 |
| H | 1.67636  | 0.51893  | -3.08170 |
| H | -1.72625 | -3.64066 | -2.62838 |
| H | 2.90329  | 2.72326  | -2.57286 |
| H | -1.96017 | -1.87964 | -2.45326 |
| H | 2.20438  | -1.00268 | -2.33615 |
| H | 5.16945  | -0.29522 | -2.06188 |
| H | -2.93513 | 3.81027  | -2.00533 |
| H | -0.45085 | 4.10774  | -1.82062 |
| H | -0.44613 | -2.61964 | -1.89227 |
| H | -3.89016 | -3.91974 | -1.59229 |
| H | 4.41448  | 2.70419  | -1.62849 |
| H | -4.01047 | 1.67053  | -1.25595 |



|    |          |          |          |
|----|----------|----------|----------|
| H  | -4.15277 | -2.21593 | -1.13720 |
| H  | -1.73265 | -5.15230 | -0.68844 |
| H  | 4.30950  | -0.94329 | -0.64914 |
| H  | 5.21140  | 0.59050  | -0.52351 |
| H  | 1.20529  | -3.22920 | -0.41326 |
| H  | 2.69123  | -2.16605 | -0.40393 |
| H  | -4.23581 | -3.50327 | 0.09789  |
| H  | 3.09570  | 3.79469  | 0.20602  |
| H  | -0.54418 | -4.23578 | 0.26556  |
| H  | 4.61330  | 2.87244  | 0.43275  |
| H  | -2.15064 | -4.60589 | 0.94918  |
| H  | -4.50452 | -1.21999 | 1.47497  |
| H  | 4.55085  | 0.52805  | 1.55999  |
| H  | 3.87765  | 3.72228  | 1.80694  |
| H  | 0.99673  | 3.08046  | 1.61498  |
| H  | -4.17701 | -2.89017 | 2.02931  |
| H  | 0.86674  | -2.76256 | 2.02598  |
| H  | 2.34064  | -1.67471 | 2.02998  |
| H  | -2.78129 | 0.65435  | 2.16844  |
| H  | 0.98118  | 1.47859  | 2.39828  |
| H  | 3.09832  | 0.08962  | 2.50147  |
| H  | -1.78088 | -3.56011 | 2.79578  |
| H  | -1.15614 | 0.17447  | 2.72335  |
| H  | 4.09643  | 1.47530  | 2.99329  |
| H  | -4.37305 | -1.58408 | 3.21386  |
| H  | 1.98681  | 2.80098  | 3.07532  |
| H  | -0.66549 | -2.24678 | 3.27385  |
| H  | -2.57437 | -0.04406 | 3.79888  |
| H  | -2.19732 | -2.48193 | 4.14421  |
| O  | 1.20842  | 2.31740  | -0.88746 |
| O  | -2.73603 | -0.37679 | -0.24951 |
| P  | 2.06731  | 0.98767  | -0.21633 |
| P  | -1.67315 | -1.52162 | 0.46446  |
| Ir | 0.44405  | -0.61395 | 0.20793  |

#### 6.4 [Cp'Fe(POCOP)Ir(H)(I)]<sup>+</sup>-endo

|    |          |          |          |
|----|----------|----------|----------|
| Ir | 1.99429  | -1.20137 | 1.03142  |
| I  | 4.41655  | -1.70010 | 2.23576  |
| Fe | -1.54040 | 0.39804  | -0.66565 |
| P  | 2.72944  | -1.28167 | -1.18836 |
| P  | 0.63000  | -1.32125 | 2.92654  |
| O  | 1.26675  | -0.84261 | -2.04624 |
| O  | -0.95430 | -1.09625 | 2.22731  |
| C  | -3.11250 | 1.33428  | -4.17996 |
| C  | -0.64695 | 1.56792  | -4.24893 |
| C  | -2.12281 | 3.60335  | -3.91590 |
| C  | -1.91934 | 2.10582  | -3.55529 |
| C  | 3.10462  | -3.05427 | -3.42332 |
| C  | 3.63872  | 0.35657  | -3.35561 |
| C  | 1.07989  | 3.41997  | -2.09467 |
| C  | 5.40493  | -0.66440 | -1.84321 |
| C  | -1.94731 | 1.98586  | -2.01042 |
| C  | 2.96171  | -3.05257 | -1.88801 |
| C  | 3.98783  | -0.04941 | -1.90753 |
| C  | -1.12182 | -1.18172 | -1.97523 |
| C  | 1.68536  | -3.83817 | -1.50605 |

|   |          |          |          |
|---|----------|----------|----------|
| C | 4.17337  | -3.74426 | -1.22483 |
| C | -3.13526 | 1.48025  | -1.35624 |
| C | 0.11504  | -0.96712 | -1.30585 |
| C | -2.29680 | -1.41936 | -1.20691 |
| C | 3.96766  | 1.19493  | -0.99390 |
| C | -0.47641 | 4.88533  | -0.77732 |
| C | -1.08126 | 2.48857  | -0.93776 |
| C | 0.12385  | 3.45170  | -0.88935 |
| C | -3.06299 | 1.65487  | 0.06255  |
| C | 0.21443  | -1.01075 | 0.11747  |
| C | -2.24940 | -1.34712 | 0.21416  |
| C | -1.76777 | 2.20890  | 0.30371  |
| C | 0.96732  | 3.20260  | 0.38581  |
| C | -5.31830 | 0.57889  | 0.57710  |
| C | -4.83098 | 2.98018  | 1.11975  |
| C | -1.00234 | -1.11207 | 0.85520  |
| C | -4.21713 | 1.54991  | 1.05543  |
| C | 0.69346  | -4.02037 | 2.37859  |
| C | -3.74050 | 1.15861  | 2.46988  |
| C | 0.42808  | -3.10113 | 3.59448  |
| C | 0.37652  | 1.34661  | 3.55948  |
| C | -0.98836 | -3.38737 | 4.13374  |
| C | 0.60593  | 0.00369  | 4.28255  |
| C | 1.49130  | -3.38110 | 4.67751  |
| C | 1.98997  | 0.03892  | 4.97040  |
| C | -0.51408 | -0.22135 | 5.31769  |
| H | -3.05136 | 1.40935  | -5.27641 |
| H | -0.74471 | 1.71265  | -5.33688 |
| H | -2.23439 | 3.70892  | -5.00720 |
| H | 3.70238  | -0.48334 | -4.06049 |
| H | -4.08622 | 1.75248  | -3.88168 |
| H | -0.51369 | 0.49270  | -4.06753 |
| H | 3.08833  | -4.10124 | -3.77184 |
| H | 2.27537  | -2.52475 | -3.91588 |
| H | -3.09593 | 0.26263  | -3.92286 |
| H | 4.05639  | -2.61776 | -3.75809 |
| H | 0.26807  | 2.07351  | -3.93144 |
| H | 4.36582  | 1.11987  | -3.68107 |
| H | -1.27319 | 4.22686  | -3.60601 |
| H | -3.03234 | 4.00547  | -3.44175 |
| H | 2.63191  | 0.79042  | -3.43097 |
| H | 0.60928  | 3.79510  | -3.01281 |
| H | -1.15535 | -1.19650 | -3.06407 |
| H | 5.54725  | -1.47871 | -2.56729 |
| H | 6.12911  | 0.12835  | -2.09566 |
| H | 1.46325  | 2.40717  | -2.28306 |
| H | 1.80646  | -4.88099 | -1.84443 |
| H | 0.78126  | -3.43663 | -1.98667 |
| H | 1.94181  | 4.07408  | -1.88819 |
| H | -3.98076 | 1.03607  | -1.87312 |
| H | 4.18487  | -4.79783 | -1.55261 |
| H | -1.08474 | 5.14656  | -1.65555 |
| H | 5.13402  | -3.30042 | -1.51512 |
| H | -3.24979 | -1.58857 | -1.71007 |
| H | 4.66865  | 1.94138  | -1.40449 |
| H | 5.65500  | -1.02898 | -0.83458 |
| H | 2.97428  | 1.66020  | -0.94916 |

|   |          |          |          |
|---|----------|----------|----------|
| H | 0.34175  | 5.62006  | -0.69853 |
| H | -5.73456 | 0.88151  | -0.39661 |
| H | 1.52513  | -3.86404 | -0.41688 |
| H | 4.11352  | -3.73117 | -0.12597 |
| H | -5.19142 | 3.30749  | 0.13189  |
| H | 4.28820  | 0.94874  | 0.02933  |
| H | -1.11094 | 4.98422  | 0.11710  |
| H | 1.85854  | 3.84872  | 0.36938  |
| H | -4.95745 | -0.45698 | 0.48769  |
| H | 1.30085  | 2.15511  | 0.44815  |
| H | -3.14855 | -1.47357 | 0.81566  |
| H | -6.14994 | 0.57776  | 1.29897  |
| H | 2.08025  | 0.34267  | 1.06445  |
| H | -4.09399 | 3.71617  | 1.47730  |
| H | 0.41585  | 3.44296  | 1.30638  |
| H | -1.37556 | 2.45013  | 1.28780  |
| H | -5.68592 | 2.98648  | 1.81522  |
| H | -0.04110 | -3.86803 | 1.57170  |
| H | 1.71393  | -3.87907 | 1.98062  |
| H | -3.25512 | 0.17164  | 2.48925  |
| H | 0.61404  | -5.07294 | 2.70092  |
| H | -3.02673 | 1.89473  | 2.87309  |
| H | 1.18029  | 1.56113  | 2.84041  |
| H | -4.60073 | 1.13115  | 3.15754  |
| H | -0.58852 | 1.35934  | 3.03201  |
| H | -1.76421 | -3.18257 | 3.38271  |
| H | 2.51054  | -3.13757 | 4.33788  |
| H | -1.04316 | -4.45780 | 4.39599  |
| H | 2.80965  | 0.17377  | 4.24849  |
| H | 0.37183  | 2.15335  | 4.31157  |
| H | 1.46948  | -4.45877 | 4.91329  |
| H | -1.50402 | -0.31296 | 4.84652  |
| H | -1.22317 | -2.81481 | 5.04053  |
| H | 2.19825  | -0.86715 | 5.55536  |
| H | 1.28573  | -2.84049 | 5.61323  |
| H | 2.00344  | 0.89374  | 5.66761  |
| H | -0.33195 | -1.10821 | 5.94122  |
| H | -0.54361 | 0.65009  | 5.99395  |

6.5  $[Cp'Fe(POCOP)Ir(H)(I)]^+ -exo$

|    |          |          |          |
|----|----------|----------|----------|
| I  | -0.18492 | 5.13144  | 0.39242  |
| Fe | 0.06400  | -1.70713 | -0.23926 |
| P  | -0.33975 | 2.33536  | -2.29365 |
| P  | -1.44694 | 1.94239  | 2.17363  |
| O  | -0.40698 | 0.61025  | -2.56048 |
| O  | -1.40881 | 0.19136  | 2.13906  |
| C  | -1.47542 | 2.69256  | -4.91627 |
| C  | 1.71686  | 1.89261  | -4.26286 |
| C  | 1.62879  | -2.11370 | -3.79698 |
| C  | -1.77533 | 2.90520  | -3.41861 |
| C  | 1.47722  | 4.23978  | -3.30754 |
| C  | 0.36112  | -4.24607 | -3.29395 |
| C  | -2.05656 | 4.39607  | -3.12788 |
| C  | -3.02056 | 2.06927  | -3.04613 |
| C  | 2.83770  | -4.13151 | -2.90349 |
| C  | 1.37622  | 2.72787  | -3.01128 |

|   |          |          |          |
|---|----------|----------|----------|
| C | 1.51006  | -3.31883 | -2.84186 |
| C | 2.35976  | 2.36144  | -1.87857 |
| C | -1.35620 | -1.44074 | -1.73896 |
| C | -0.85230 | -0.13477 | -1.49668 |
| C | 1.37350  | -2.88939 | -1.38430 |
| C | 2.06321  | -1.82077 | -0.73171 |
| C | -1.87544 | -2.19772 | -0.65134 |
| C | 0.75347  | -3.63220 | -0.32977 |
| C | -0.90103 | 0.46383  | -0.20325 |
| C | -1.82648 | -1.67463 | 0.67188  |
| C | 1.98281  | -1.95298 | 0.70731  |
| C | 3.20425  | 0.25968  | 0.95878  |
| C | 1.10752  | -3.10100 | 0.96872  |
| C | -1.34451 | -0.35360 | 0.87925  |
| C | 4.34435  | -1.91619 | 1.44965  |
| C | -4.10484 | 1.43802  | 1.42760  |
| C | 2.99016  | -1.15261 | 1.55852  |
| C | -0.28251 | -5.02102 | 1.90285  |
| C | -3.62979 | 3.72244  | 2.36529  |
| C | 0.73118  | -3.89610 | 2.24504  |
| C | -3.31314 | 2.21619  | 2.50363  |
| C | 2.01744  | -4.60122 | 2.75725  |
| C | 2.65186  | -0.98658 | 3.05059  |
| C | 1.07145  | 2.40432  | 3.20974  |
| C | 0.09179  | -3.07337 | 3.38688  |
| C | -0.38665 | 2.31387  | 3.70972  |
| C | -3.74744 | 1.68807  | 3.88749  |
| C | -0.77968 | 3.69128  | 4.29162  |
| C | -0.49824 | 1.21053  | 4.78388  |
| H | -2.38180 | 2.94802  | -5.49138 |
| H | -0.66881 | 3.34546  | -5.27803 |
| H | 1.11505  | 2.16744  | -5.13825 |
| H | -1.22098 | 1.64669  | -5.14478 |
| H | 1.77040  | -2.46879 | -4.83011 |
| H | 2.77434  | 2.07752  | -4.51928 |
| H | 0.53388  | -4.56959 | -4.33234 |
| H | 0.86069  | 4.54061  | -4.16765 |
| H | 3.00624  | -4.48965 | -3.93200 |
| H | 1.59500  | 0.81578  | -4.07982 |
| H | -2.92896 | 4.70919  | -3.72642 |
| H | -3.86735 | 2.42216  | -3.65818 |
| H | 2.52580  | 4.47300  | -3.55948 |
| H | 0.73285  | -1.47582 | -3.77445 |
| H | -1.21543 | 5.04848  | -3.40124 |
| H | 2.49904  | -1.48621 | -3.54633 |
| H | -0.62013 | -3.74870 | -3.26226 |
| H | -2.88012 | 0.99781  | -3.25140 |
| H | 0.30359  | -5.15628 | -2.67648 |
| H | 3.69995  | -3.51219 | -2.61107 |
| H | -1.34331 | -1.84280 | -2.75113 |
| H | 1.20136  | 4.85525  | -2.43617 |
| H | 2.80323  | -5.00798 | -2.23747 |
| H | 3.39240  | 2.52730  | -2.23010 |
| H | -2.28558 | 4.57291  | -2.06652 |
| H | -3.30826 | 2.19071  | -1.99039 |
| H | 2.26304  | 1.30312  | -1.59229 |
| H | 2.62981  | -1.04991 | -1.24799 |

|    |          |          |          |
|----|----------|----------|----------|
| H  | 2.20317  | 2.98674  | -0.98480 |
| H  | -2.25450 | -3.20601 | -0.82319 |
| H  | 0.11110  | -4.49319 | -0.48855 |
| H  | -2.19731 | 2.53611  | -0.35687 |
| H  | 3.70482  | 0.22404  | -0.01988 |
| H  | 4.67308  | -2.00131 | 0.40220  |
| H  | -3.87374 | 1.77573  | 0.40606  |
| H  | 2.25255  | 0.79941  | 0.83852  |
| H  | 0.13778  | -5.77114 | 1.21538  |
| H  | -3.31366 | 4.12264  | 1.39029  |
| H  | -1.21350 | -4.62483 | 1.46589  |
| H  | -5.17952 | 1.61949  | 1.59641  |
| H  | -3.93732 | 0.35269  | 1.48553  |
| H  | -2.18982 | -2.25929 | 1.51653  |
| H  | 3.85274  | 0.84905  | 1.62506  |
| H  | 4.27841  | -2.93111 | 1.86836  |
| H  | 2.47904  | -5.20950 | 1.96302  |
| H  | 5.12046  | -1.36692 | 2.00766  |
| H  | -4.72132 | 3.85639  | 2.45292  |
| H  | 1.20983  | 3.24288  | 2.51065  |
| H  | -0.55445 | -5.54963 | 2.82932  |
| H  | 1.39737  | 1.47725  | 2.72052  |
| H  | -3.15868 | 4.33207  | 3.14799  |
| H  | 2.77012  | -3.88789 | 3.11964  |
| H  | -0.85394 | -2.61320 | 3.06948  |
| H  | 1.65797  | -0.54176 | 3.19734  |
| H  | 1.76308  | -5.27234 | 3.59356  |
| H  | -0.75175 | 4.48535  | 3.52925  |
| H  | 3.39268  | -0.31690 | 3.51547  |
| H  | 2.69581  | -1.93769 | 3.59719  |
| H  | -4.84324 | 1.78828  | 3.96778  |
| H  | 0.73852  | -2.27787 | 3.76446  |
| H  | -3.50123 | 0.62325  | 4.01792  |
| H  | 1.73237  | 2.57194  | 4.07739  |
| H  | -0.13156 | -3.74612 | 4.23038  |
| H  | -0.24738 | 0.21872  | 4.38163  |
| H  | -3.30995 | 2.25849  | 4.71814  |
| H  | -1.76818 | 3.68734  | 4.77194  |
| H  | -0.04045 | 3.95447  | 5.06702  |
| H  | -1.49654 | 1.15364  | 5.23745  |
| H  | 0.21878  | 1.44382  | 5.58942  |
| Ir | -0.70124 | 2.45832  | 0.01406  |

6.6  $[Cp'Fe(POCOP)Ir(C_2H_4)]^+$

|   |          |          |          |
|---|----------|----------|----------|
| C | -2.37697 | 0.67255  | -5.21471 |
| C | 3.34482  | 0.77679  | -4.74886 |
| C | -2.01102 | 2.89243  | -4.14993 |
| C | -0.54789 | -2.54782 | -4.18060 |
| C | -2.11758 | 1.37267  | -3.85272 |
| C | 3.22603  | 2.84708  | -3.33531 |
| C | 3.03337  | 1.31529  | -3.32133 |
| C | 0.41428  | 1.65530  | -3.39462 |
| C | -0.77455 | 0.83595  | -3.29595 |
| C | -3.34446 | 1.20124  | -2.92714 |
| C | 1.58710  | 0.91376  | -3.04533 |
| C | -0.93384 | -1.89608 | -2.81908 |

|   |          |          |          |
|---|----------|----------|----------|
| C | -0.31858 | -0.48140 | -2.83663 |
| C | -2.46302 | -1.98040 | -2.67412 |
| C | 1.11051  | -0.37284 | -2.64374 |
| C | 4.01691  | 0.66452  | -2.32748 |
| C | -0.29826 | -2.74664 | -1.68899 |
| C | 0.25458  | 2.93219  | -0.63501 |
| C | -1.02134 | 2.35562  | -0.38872 |
| C | 1.42428  | 2.23709  | -0.22294 |
| C | 2.62820  | -2.90683 | 0.50572  |
| C | -4.78265 | -0.87348 | 0.64351  |
| C | -1.10854 | 1.14013  | 0.34389  |
| C | 1.29381  | 1.00823  | 0.47879  |
| C | 4.67777  | -1.53422 | 0.92852  |
| C | -3.12422 | -2.74698 | 0.88807  |
| C | 0.03323  | 0.45740  | 0.87085  |
| C | 3.40106  | -2.11205 | 1.57939  |
| C | -3.77687 | -1.54552 | 1.60545  |
| C | 3.79642  | -3.05214 | 2.73849  |
| C | -4.52337 | -2.06413 | 2.85548  |
| C | -4.36207 | 1.51593  | 3.03421  |
| C | 4.41449  | 0.53798  | 3.51057  |
| C | -1.95221 | 2.11970  | 3.32639  |
| C | -2.96447 | 0.95343  | 3.36772  |
| C | 0.35911  | -2.80881 | 3.51424  |
| C | 2.90747  | 0.24673  | 3.64734  |
| C | 2.14228  | 1.58837  | 3.66299  |
| C | -0.96087 | -2.42261 | 3.80193  |
| C | -2.94684 | 0.34892  | 4.78836  |
| C | 2.62403  | -0.49466 | 4.97132  |
| H | -1.52904 | 0.82294  | -5.90178 |
| H | -3.27648 | 1.09991  | -5.68704 |
| H | 2.66930  | 1.21730  | -5.49883 |
| H | 4.37993  | 1.03380  | -5.02687 |
| H | -2.53751 | -0.40892 | -5.10582 |
| H | -0.97882 | -1.99948 | -5.03208 |
| H | -1.26829 | 3.11738  | -4.93094 |
| H | 3.24003  | -0.31851 | -4.79419 |
| H | -2.98412 | 3.25378  | -4.51608 |
| H | 0.54452  | -2.57960 | -4.31498 |
| H | -0.92669 | -3.58267 | -4.21471 |
| H | 2.59077  | 3.33105  | -4.09391 |
| H | 4.27134  | 3.08709  | -3.58575 |
| H | 0.41915  | 2.69731  | -3.70015 |
| H | -2.98832 | -1.56640 | -3.54472 |
| H | -4.22354 | 1.65864  | -3.40952 |
| H | -1.76101 | 3.47540  | -3.24881 |
| H | 5.04943  | 0.95672  | -2.57700 |
| H | -3.59114 | 0.15649  | -2.72294 |
| H | -2.75807 | -3.03899 | -2.59605 |
| H | 3.00552  | 3.30741  | -2.36034 |
| H | 3.96889  | -0.43505 | -2.37673 |
| H | 1.74459  | -1.18141 | -2.28839 |
| H | -3.19415 | 1.70406  | -1.96160 |
| H | 0.76057  | -2.96805 | -1.88945 |
| H | -2.81803 | -1.46474 | -1.77185 |
| H | -0.81571 | -3.71704 | -1.62735 |
| H | 3.81574  | 0.96514  | -1.28841 |

|    |          |          |          |
|----|----------|----------|----------|
| H  | 0.33762  | 3.86830  | -1.18895 |
| H  | -1.93361 | 2.84936  | -0.72243 |
| H  | -0.36265 | -2.25146 | -0.70519 |
| H  | 2.41842  | 2.62486  | -0.44142 |
| H  | -4.29350 | -0.49415 | -0.26339 |
| H  | 2.37487  | -2.26595 | -0.35152 |
| H  | 3.26465  | -3.73055 | 0.13937  |
| H  | 4.44258  | -0.81517 | 0.13286  |
| H  | -5.52659 | -1.63081 | 0.34270  |
| H  | -2.49955 | -2.43258 | 0.04374  |
| H  | 5.23377  | -2.37221 | 0.47389  |
| H  | -3.92135 | -3.40261 | 0.49743  |
| H  | -5.32534 | -0.04175 | 1.11018  |
| H  | 1.69241  | -3.33393 | 0.89332  |
| H  | 5.34723  | -1.05198 | 1.65113  |
| H  | -2.49439 | -3.34639 | 1.56027  |
| H  | -4.41022 | 1.90877  | 2.00770  |
| H  | 4.42081  | -3.86397 | 2.32803  |
| H  | -5.24060 | -2.83596 | 2.52778  |
| H  | 4.66007  | 0.99891  | 2.54246  |
| H  | -1.99700 | 2.67608  | 2.37882  |
| H  | 2.38118  | 2.21051  | 2.78795  |
| H  | 0.53759  | -3.65583 | 2.84488  |
| H  | -5.16846 | 0.78207  | 3.17316  |
| H  | 2.92924  | -3.52364 | 3.22089  |
| H  | -5.10065 | -1.28157 | 3.36677  |
| H  | 4.39559  | -2.54364 | 3.50866  |
| H  | -1.78233 | -3.01401 | 3.39561  |
| H  | 5.03569  | -0.35860 | 3.64940  |
| H  | -3.85374 | -2.53798 | 3.58850  |
| H  | -4.56866 | 2.35583  | 3.71968  |
| H  | -0.92278 | 1.76333  | 3.47692  |
| H  | 1.05501  | 1.42182  | 3.69237  |
| H  | 4.70072  | 1.25371  | 4.30040  |
| H  | -2.19735 | 2.82417  | 4.13909  |
| H  | 1.13745  | -2.62622 | 4.25656  |
| H  | 2.43417  | 2.15039  | 4.56633  |
| H  | -1.18267 | -1.89706 | 4.73312  |
| H  | -3.59661 | -0.53068 | 4.89931  |
| H  | 3.10380  | -1.48361 | 5.02274  |
| H  | -1.92554 | 0.07671  | 5.09368  |
| H  | 1.54284  | -0.61330 | 5.13801  |
| H  | -3.30895 | 1.11490  | 5.49522  |
| H  | 3.02682  | 0.10745  | 5.80342  |
| O  | -2.35835 | 0.67332  | 0.67157  |
| O  | 2.44208  | 0.38441  | 0.90034  |
| P  | -2.35842 | -0.34083 | 2.08032  |
| P  | 2.18812  | -0.75654 | 2.17792  |
| Fe | 0.23127  | 1.05667  | -1.44606 |
| Ir | -0.12482 | -1.01977 | 2.25586  |

### 6.7 [Cp'Fe(POCOP)Ir]<sup>+</sup>

|   |          |           |           |
|---|----------|-----------|-----------|
| C | 4.283371 | -2.232391 | -0.581493 |
| C | 1.530252 | 0.208820  | -2.755024 |
| C | 3.967669 | 0.314643  | -0.938064 |
| C | 1.140479 | -1.057747 | -2.236159 |

|    |           |           |           |
|----|-----------|-----------|-----------|
| C  | 3.670733  | -0.871290 | -0.162240 |
| C  | 3.886837  | 2.937797  | -0.603046 |
| C  | 1.022767  | 1.402192  | -2.169208 |
| C  | 3.503699  | 1.496729  | -0.277735 |
| C  | 0.175745  | -1.122894 | -1.195279 |
| C  | 2.966304  | -0.401653 | 1.037274  |
| C  | 0.085083  | 1.315286  | -1.107030 |
| C  | 2.838189  | 1.031237  | 0.898920  |
| C  | -2.917455 | -2.876233 | -1.611790 |
| C  | -0.457695 | 0.057257  | -0.680232 |
| C  | -2.862860 | 2.404761  | -2.352979 |
| C  | 2.642247  | -1.020065 | 2.413603  |
| C  | -1.801703 | -3.636521 | 1.241534  |
| C  | -3.136582 | 4.562946  | -1.096463 |
| C  | -3.182269 | 3.028847  | -0.976308 |
| C  | -4.586758 | 2.559892  | -0.528710 |
| C  | -1.646179 | 3.375404  | 1.770448  |
| H  | 2.268560  | 0.265647  | -3.556124 |
| H  | 4.481267  | 0.310792  | -1.894942 |
| H  | 1.553212  | -1.979528 | -2.645633 |
| H  | 1.354276  | 2.382307  | -2.510141 |
| H  | -1.900969 | 2.759817  | -2.751909 |
| H  | -3.653474 | 2.695790  | -3.065170 |
| H  | -2.837708 | 1.305272  | -2.296939 |
| H  | 2.343292  | 1.675664  | 1.621190  |
| H  | -2.133880 | 4.927414  | -1.366014 |
| H  | -3.826528 | 4.871397  | -1.900907 |
| H  | -3.465126 | 5.070438  | -0.177846 |
| H  | -5.330123 | 2.899589  | -1.270174 |
| H  | -4.638928 | 1.459034  | -0.479476 |
| H  | -4.884009 | 2.969239  | 0.448281  |
| O  | -0.283459 | -2.353466 | -0.784813 |
| O  | -0.426328 | 2.479187  | -0.577970 |
| P  | -1.892135 | -2.288266 | -0.105782 |
| P  | -1.936052 | 2.267386  | 0.257089  |
| Fe | 1.933161  | 0.184653  | -0.751103 |
| Ir | -2.060662 | -0.037697 | 0.388945  |
| C  | -2.566211 | -1.931565 | -2.782978 |
| H  | -2.734194 | -0.878292 | -2.511512 |
| H  | -1.524684 | -2.050081 | -3.116212 |
| H  | -3.219998 | -2.176287 | -3.637227 |
| C  | -4.415384 | -2.690010 | -1.276093 |
| H  | -4.628723 | -1.652761 | -0.968116 |
| H  | -5.008921 | -2.895106 | -2.183494 |
| H  | -4.772286 | -3.368929 | -0.489936 |
| C  | -2.611112 | -4.325320 | -2.036827 |
| H  | -2.936670 | -5.069689 | -1.296230 |
| H  | -3.152503 | -4.541512 | -2.973973 |
| H  | -1.537934 | -4.470014 | -2.234551 |
| C  | -0.806172 | -4.758832 | 0.883744  |
| H  | 0.202735  | -4.365118 | 0.697375  |
| H  | -0.748257 | -5.458132 | 1.735374  |
| H  | -1.116493 | -5.334033 | 0.001076  |
| C  | -3.207505 | -4.223551 | 1.500334  |
| H  | -3.579305 | -4.833794 | 0.665938  |
| H  | -3.146209 | -4.879391 | 2.385272  |
| H  | -3.952301 | -3.443632 | 1.728088  |



|   |           |           |           |
|---|-----------|-----------|-----------|
| C | -1.346952 | -2.920899 | 2.532214  |
| H | -0.374526 | -2.428879 | 2.412217  |
| H | -2.073839 | -2.156061 | 2.849132  |
| H | -1.256818 | -3.665419 | 3.342150  |
| C | -3.001521 | 3.591099  | 2.479797  |
| H | -2.821267 | 4.103217  | 3.439913  |
| H | -3.688478 | 4.220931  | 1.895568  |
| H | -3.507309 | 2.638229  | 2.709642  |
| C | -0.716925 | 2.563320  | 2.696490  |
| H | -1.142754 | 1.577859  | 2.942113  |
| H | 0.264171  | 2.401176  | 2.226519  |
| H | -0.559904 | 3.124845  | 3.633338  |
| C | -0.972467 | 4.723586  | 1.441934  |
| H | -1.628221 | 5.407276  | 0.888874  |
| H | -0.705503 | 5.218964  | 2.391406  |
| H | -0.046726 | 4.583418  | 0.865264  |
| C | 2.796526  | 3.942109  | -0.174194 |
| H | 3.127155  | 4.968766  | -0.398353 |
| H | 1.841028  | 3.767876  | -0.690932 |
| H | 2.607440  | 3.891201  | 0.910047  |
| C | 5.171980  | 3.218420  | 0.230843  |
| H | 5.519408  | 4.247753  | 0.045375  |
| H | 4.979547  | 3.110808  | 1.309776  |
| H | 5.985139  | 2.527847  | -0.042778 |
| C | 4.234007  | 3.132136  | -2.094718 |
| H | 3.376350  | 2.937255  | -2.756437 |
| H | 4.555136  | 4.171187  | -2.268347 |
| H | 5.063595  | 2.479038  | -2.408770 |
| C | 4.883652  | -2.135004 | -2.009736 |
| H | 4.126060  | -1.864572 | -2.763129 |
| H | 5.710999  | -1.411023 | -2.068492 |
| H | 5.293239  | -3.116555 | -2.292915 |
| C | 5.468424  | -2.532085 | 0.377069  |
| H | 5.138326  | -2.686346 | 1.413843  |
| H | 5.987274  | -3.447846 | 0.050128  |
| H | 6.199376  | -1.707861 | 0.371510  |
| C | 3.309583  | -3.434431 | -0.601290 |
| H | 2.939368  | -3.707729 | 0.389989  |
| H | 2.436950  | -3.242205 | -1.240328 |
| H | 3.836668  | -4.313102 | -1.006740 |
| C | 2.410701  | -2.540828 | 2.447096  |
| H | 1.623847  | -2.851742 | 1.745871  |
| H | 3.325024  | -3.105331 | 2.222291  |
| H | 2.095731  | -2.833385 | 3.461418  |
| C | 3.862422  | -0.697517 | 3.327019  |
| H | 4.031312  | 0.388147  | 3.400165  |
| H | 3.674537  | -1.083120 | 4.342620  |
| H | 4.787827  | -1.160765 | 2.953022  |
| C | 1.396748  | -0.336035 | 3.031002  |
| H | 0.528604  | -0.369706 | 2.352634  |
| H | 1.127237  | -0.846238 | 3.969140  |
| H | 1.589789  | 0.715450  | 3.289402  |

### 6.8 [(POCOP)Ir]

|   |         |          |          |
|---|---------|----------|----------|
| C | 1.89513 | -0.47325 | -4.16911 |
| C | 1.36604 | 2.80375  | -2.86515 |

|   |          |          |          |
|---|----------|----------|----------|
| C | 3.92796  | -1.01571 | -2.74327 |
| C | 2.39390  | -0.85912 | -2.76192 |
| C | 3.79000  | 2.30826  | -2.30033 |
| C | 1.75692  | -2.20660 | -2.34679 |
| C | 2.32965  | 2.18113  | -1.83052 |
| C | -4.32012 | -1.38789 | -0.77970 |
| C | 2.16047  | 2.92305  | -0.48438 |
| C | -3.69967 | 2.05824  | -0.10275 |
| C | -2.35518 | -2.81167 | -0.10437 |
| C | -3.32797 | -1.70119 | 0.35829  |
| C | 1.97667  | -0.35657 | 0.99076  |
| C | 0.56166  | -0.32928 | 0.94113  |
| C | -3.20306 | 1.36694  | 1.18643  |
| C | -4.06937 | -2.19278 | 1.61809  |
| C | -2.16817 | 2.28611  | 1.87612  |
| C | -4.37383 | 1.10703  | 2.15123  |
| C | 2.67721  | -0.70593 | 2.14975  |
| C | -0.12166 | -0.66537 | 2.13500  |
| C | 1.95544  | -1.03751 | 3.30592  |
| C | 0.55299  | -1.01859 | 3.30823  |
| H | 2.12631  | -1.29107 | -4.87401 |
| H | 2.38158  | 0.43827  | -4.55060 |
| H | 0.80277  | -0.32106 | -4.18642 |
| H | 1.43250  | 2.32264  | -3.85307 |
| H | 4.20288  | -1.88080 | -3.37275 |
| H | 3.94176  | 1.91082  | -3.31567 |
| H | 4.45278  | -0.13772 | -3.14307 |
| H | 2.07624  | -2.98865 | -3.05904 |
| H | 1.61461  | 3.87175  | -2.99679 |
| H | 4.06649  | 3.37760  | -2.32440 |
| H | 0.32204  | 2.73891  | -2.51517 |
| H | 0.65717  | -2.14778 | -2.34580 |
| H | 4.29536  | -1.20881 | -1.72464 |
| H | 4.48405  | 1.79969  | -1.61407 |
| H | -3.80447 | -0.99932 | -1.67401 |
| H | -4.83987 | -2.31626 | -1.07501 |
| H | 2.07771  | -2.51071 | -1.33829 |
| H | -1.79971 | -2.50926 | -1.00600 |
| H | -2.85679 | 2.27095  | -0.78164 |
| H | -4.44353 | 1.45792  | -0.64890 |
| H | 2.37009  | 3.99623  | -0.63952 |
| H | -5.09006 | -0.66130 | -0.47597 |
| H | -2.93430 | -3.72599 | -0.32658 |
| H | -4.17514 | 3.01973  | 0.16032  |
| H | 1.13278  | 2.81732  | -0.10059 |
| H | 2.85456  | 2.54080  | 0.27860  |
| H | -1.61889 | -3.05473 | 0.67751  |
| H | -4.53860 | -3.16753 | 1.39448  |
| H | -1.29668 | 2.45979  | 1.22422  |
| H | -5.20310 | 0.56521  | 1.67086  |
| H | -4.86691 | -1.50959 | 1.93931  |
| H | -2.64412 | 3.25834  | 2.09468  |
| H | 3.76921  | -0.71283 | 2.13570  |
| H | -4.77515 | 2.07665  | 2.49667  |
| H | -3.37366 | -2.33743 | 2.45763  |
| H | -1.81043 | 1.85436  | 2.82253  |
| H | -4.05140 | 0.54386  | 3.04018  |

|    |          |          |          |
|----|----------|----------|----------|
| H  | 2.49256  | -1.31221 | 4.21677  |
| H  | -0.02091 | -1.27061 | 4.20250  |
| O  | 2.70345  | -0.02575 | -0.15454 |
| O  | -1.51775 | -0.64688 | 2.14738  |
| P  | 1.73181  | 0.40147  | -1.49226 |
| P  | -2.21750 | -0.17979 | 0.66146  |
| Ir | -0.40502 | 0.17791  | -0.69470 |
